# Supplementary material for: A high-resolution dataset of Rock Glaciers in the Peruvian Andes (PRoGI): inventory, characterization and topoclimatic attributes
Source: Copernicus journal article supplement (doi:10.5194/essd-2025-390), 2025-08-13
Supplement: Supplementary file 1 [file essd-2025-390-supplement.pdf]

*Supplement of*

**A high-resolution dataset of Rock Glaciers in the Peruvian Andes (PRoGI): inventory, characterization and topoclimatic attributes.**

**Katy Medina et al.**

*Correspondence to:* Katy Medina (kmedinam@unasam.edu.pe)

The copyright of individual parts of the supplement might differ from the article licence

**Table S1.** Experts who participated in the review of the digitization of rock glacier contours.

| <b>N°</b> | <b>Name of the expert</b> | <b>Affiliation</b>                                                                | <b>Country</b> | <b>Expertise</b> |
|-----------|---------------------------|-----------------------------------------------------------------------------------|----------------|------------------|
| 1         | Mariano Castro            | Argentine Institute of Snow, Glaciology and Environmental Sciences (IANIGLA)      | Argentina      | High             |
| 2         | Francisco Ferrando Acuña  | Faculty of Architecture and Urban Planning, University of Chile                   | Chile          | Medium           |
| 3         | Daniel Falaschi           | Argentine Institute of Snow, Glaciology and Environmental Sciences (IANIGLA)      | Argentina      | High             |
| 4         | Umberto Morra di Cella    | Department at Environmental Protection Agency of Aosta Valley (ARPA - VdA)        | Italy          | High             |
| 5         | Xavier Bodin              | National Center for Scientific Research (CNRS)                                    | France         | High             |
| 6         | Darío Trombotto           | Argentine Institute of Snow, Glaciology and Environmental Sciences (IANIGLA)      | Argentina      | High             |
| 7         | Lukas Arenson             | BGC Engineering Inc.                                                              | Canada         | High             |
| 8         | Lidia Ferri               | Argentine Institute of Snow, Glaciology and Environmental Sciences (IANIGLA)      | Argentina      | High             |
| 9         | Sebastián Vivero          | Swiss Federal Institute of Technology in Lausanne                                 | Switzerland    | High             |
| 10        | Roberto Merino            | National Geology and Mining Service (SERNAGEOMIN)                                 | Chile          | Medium           |
| 11        | Guillermo Azócar          | Atacama Ambiente E.I.R.L.                                                         | Chile          | High             |
| 12        | Pedro Straub              | Atacama Ambiente E.I.R.L.                                                         | Chile          | Medium           |
| 13        | Carla Tapia               | Argentine Institute of Snow, Glaciology and Environmental Sciences (IANIGLA)      | Argentina      | Medium           |
| 14        | Edwin Loarte              | Faculty of Environmental Sciences, Santiago Antúnez de Mayolo National University | Peru           | High             |
| 15        | Katy Medina               | Faculty of Environmental Sciences, Santiago Antúnez de Mayolo National University | Peru           | High             |
| 16        | Yan Hu                    | Faculty of Science, The Chinese University of Hong Kong                           | China          | High             |

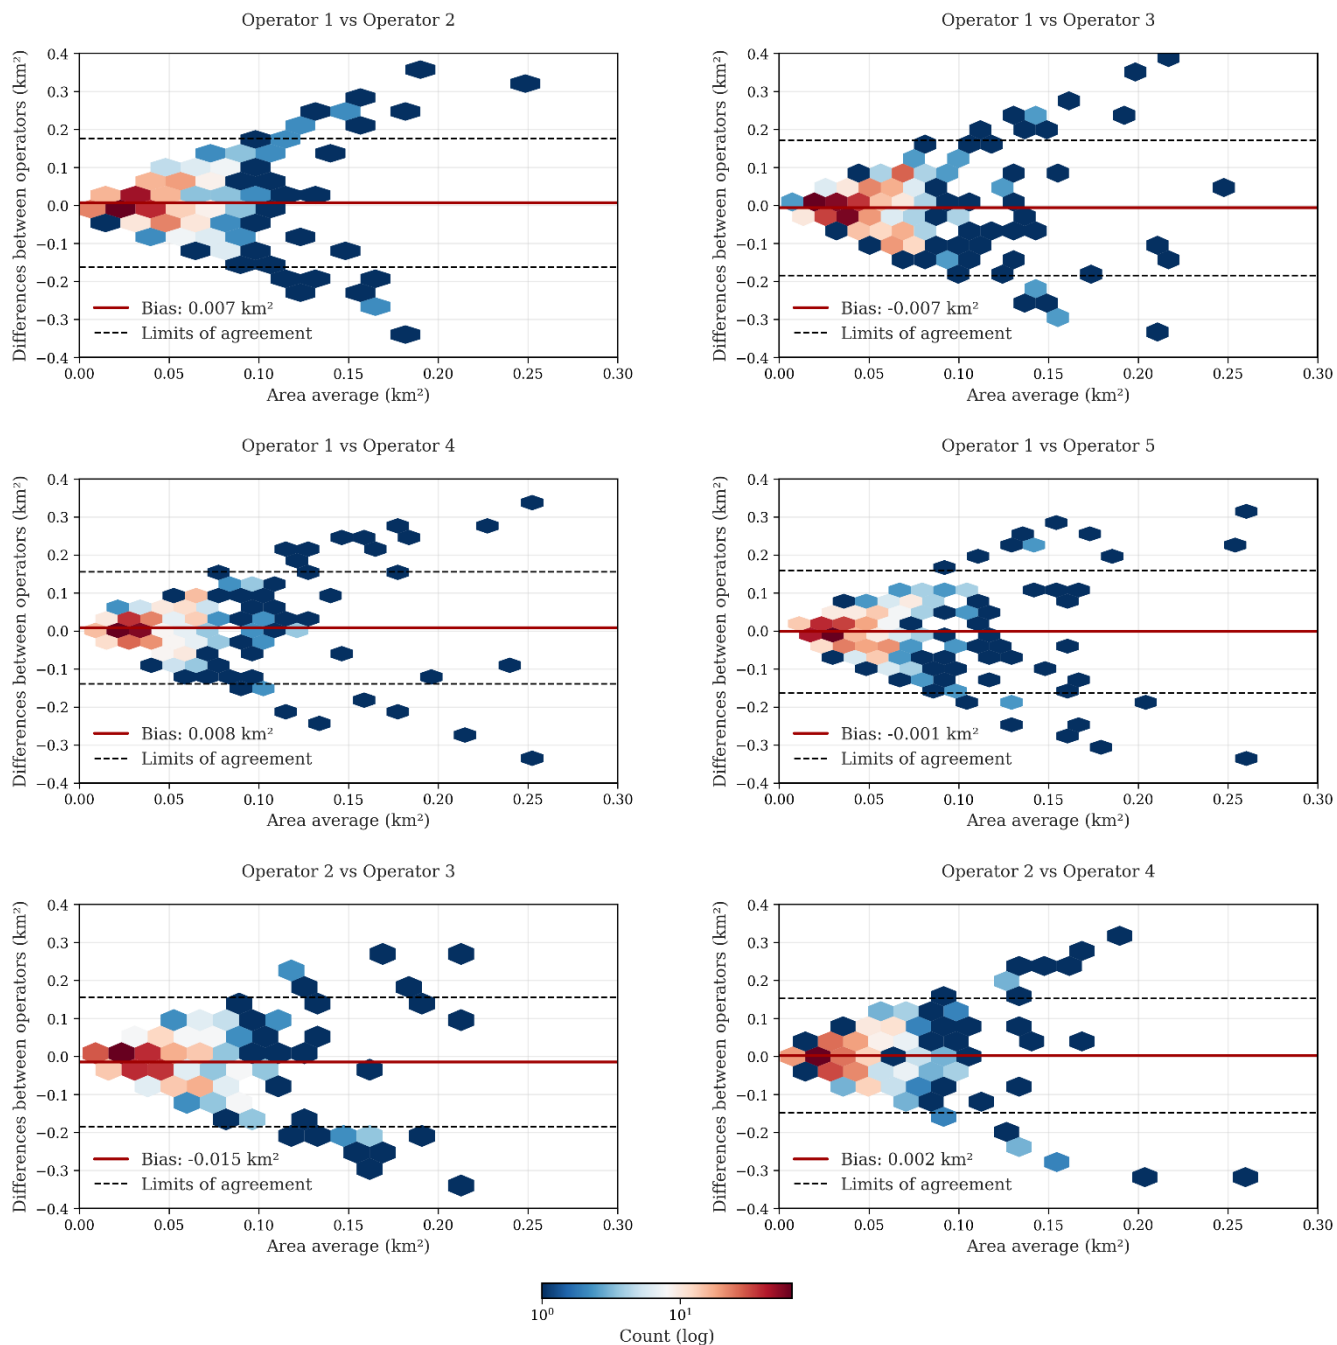

**Figure S1.** Bland-Altman analysis of interoperator consistency in the rock glacier inventory. Each subplot compares the area differences (km<sup>2</sup>) between two operators versus their average, showing the bias (red line) and 95% agreement limits (gray lines). The density of points is visualized as hexagons (logarithmic scale).

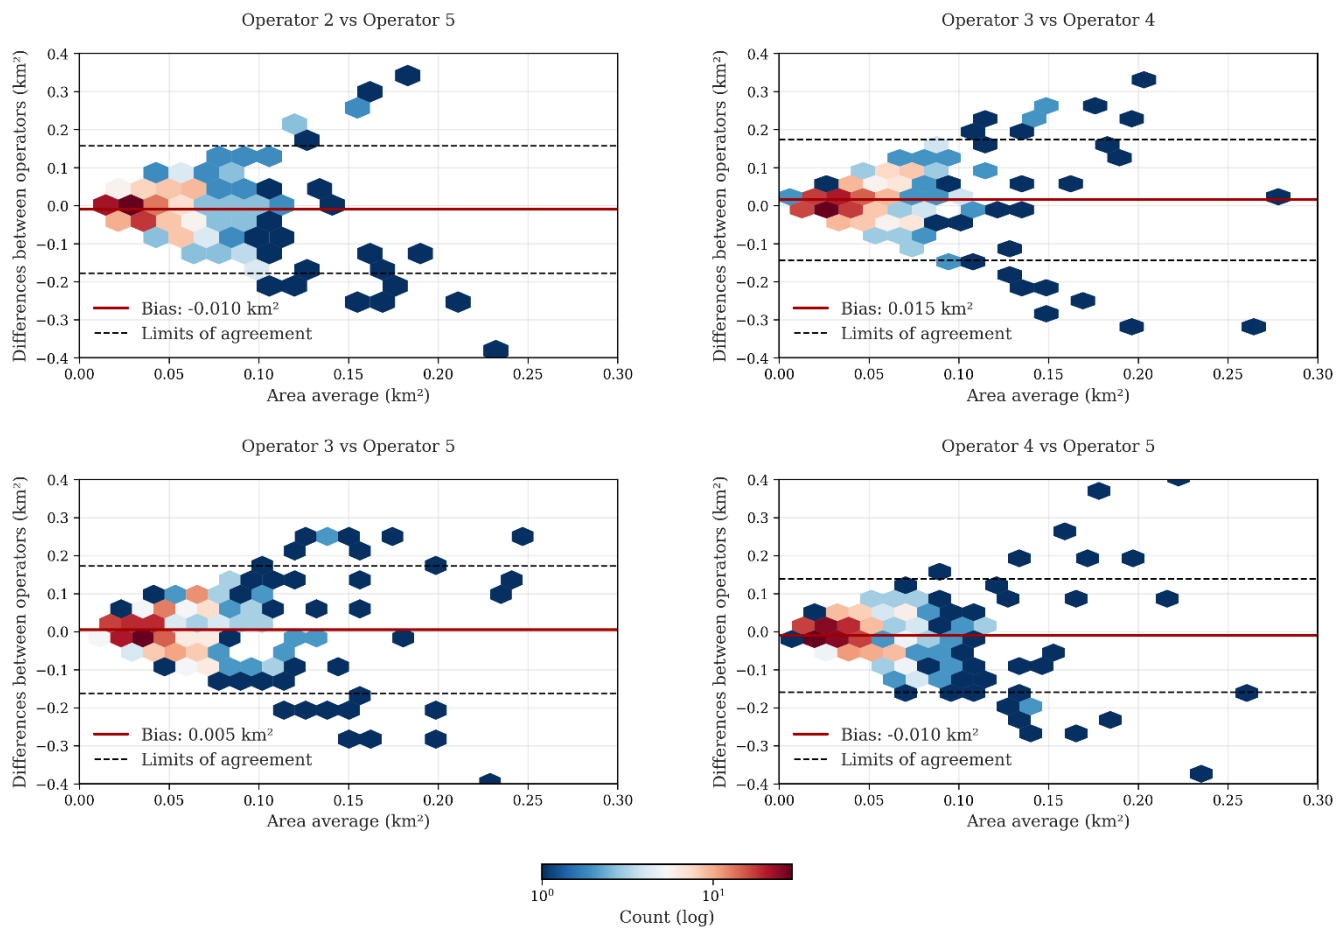

**Figure S1 (continuation).** Bland-Altman analysis of interoperator consistency in the rock glacier inventory. Each subplot compares the area differences ( $\text{km}^2$ ) between two operators versus their average, showing the bias (red line) and 95% agreement limits (gray lines). The density of points is visualized as hexagons (logarithmic scale).
